# Supplementary material
Source: PubMed Central journal article supplement (PMC3502902)
Supplement: AEM.01859-12_zam999103935so1.pdf [file AEM.01859-12_zam999103935so1.pdf]

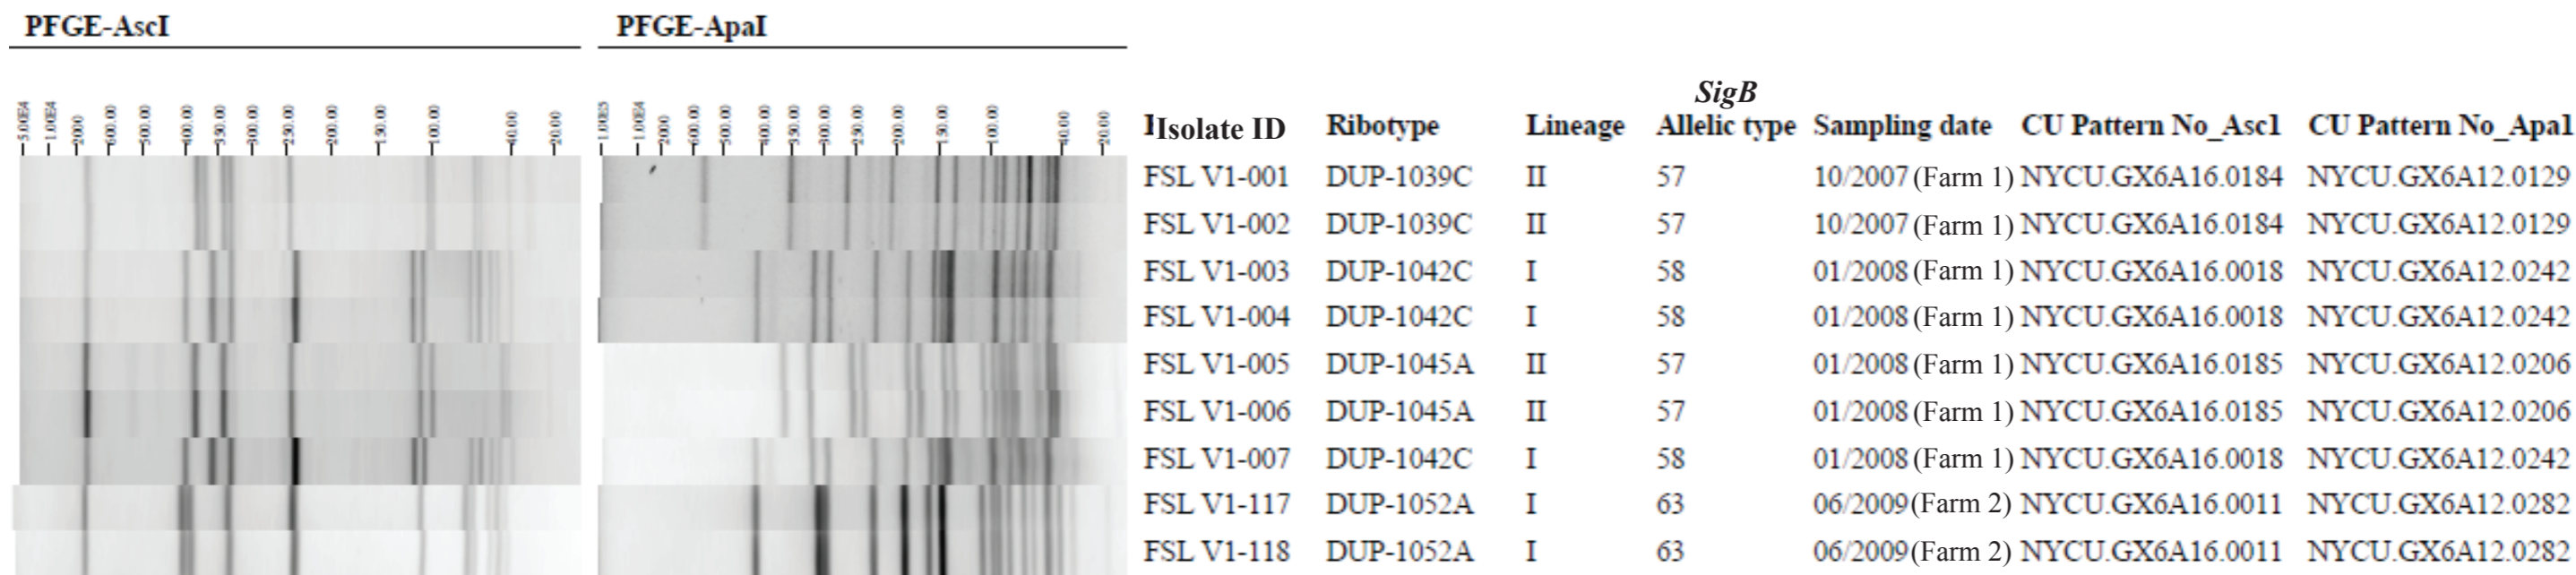

FIG. S1. PFGE types, *sigB* allelic types, and ribotype patterns of *L. monocytogenes* isolates obtained from two dairy farms.

**PFGE-AscI**

**PFGE-ApaI**

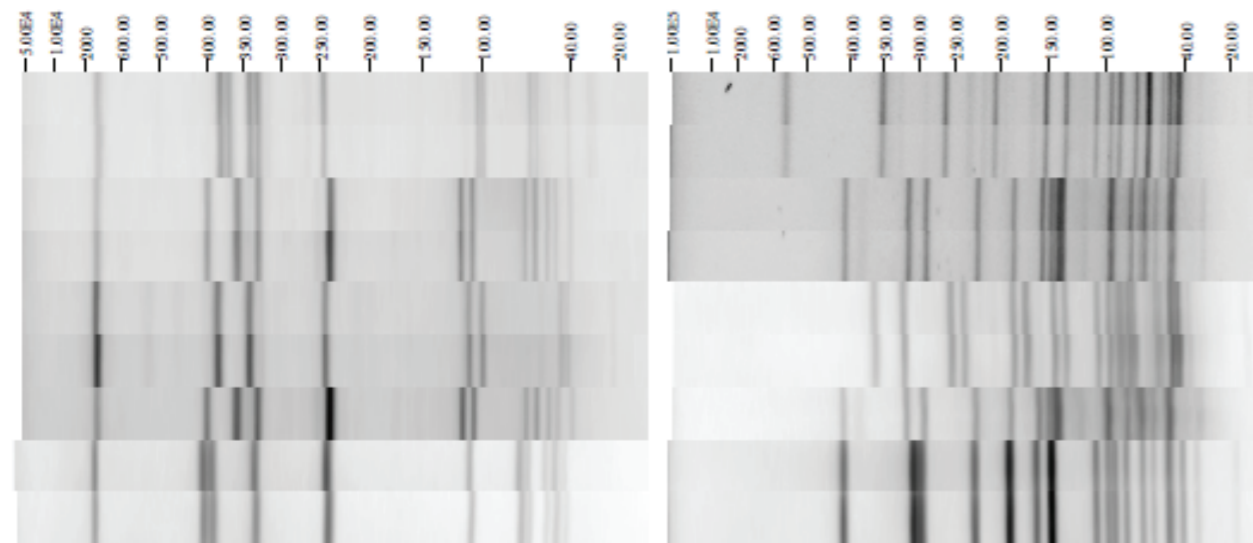

| Isolate ID | Ribotype  | Lineage | <i>SigB</i>  | Sampling date    | CU Pattern No_AscI | CU Pattern No_ApaI |
|------------|-----------|---------|--------------|------------------|--------------------|--------------------|
|            |           |         | Allelic type |                  |                    |                    |
| FSL V1-001 | DUP-1039C | II      | 57           | 10/2007 (Farm 1) | NYCU.GX6A16.0184   | NYCU.GX6A12.0129   |
| FSL V1-002 | DUP-1039C | II      | 57           | 10/2007 (Farm 1) | NYCU.GX6A16.0184   | NYCU.GX6A12.0129   |
| FSL V1-003 | DUP-1042C | I       | 58           | 01/2008 (Farm 1) | NYCU.GX6A16.0018   | NYCU.GX6A12.0242   |
| FSL V1-004 | DUP-1042C | I       | 58           | 01/2008 (Farm 1) | NYCU.GX6A16.0018   | NYCU.GX6A12.0242   |
| FSL V1-005 | DUP-1045A | II      | 57           | 01/2008 (Farm 1) | NYCU.GX6A16.0185   | NYCU.GX6A12.0206   |
| FSL V1-006 | DUP-1045A | II      | 57           | 01/2008 (Farm 1) | NYCU.GX6A16.0185   | NYCU.GX6A12.0206   |
| FSL V1-007 | DUP-1042C | I       | 58           | 01/2008 (Farm 1) | NYCU.GX6A16.0018   | NYCU.GX6A12.0242   |
| FSL V1-117 | DUP-1052A | I       | 63           | 06/2009 (Farm 2) | NYCU.GX6A16.0011   | NYCU.GX6A12.0282   |
| FSL V1-118 | DUP-1052A | I       | 63           | 06/2009 (Farm 2) | NYCU.GX6A16.0011   | NYCU.GX6A12.0282   |

## PFGE-AscI

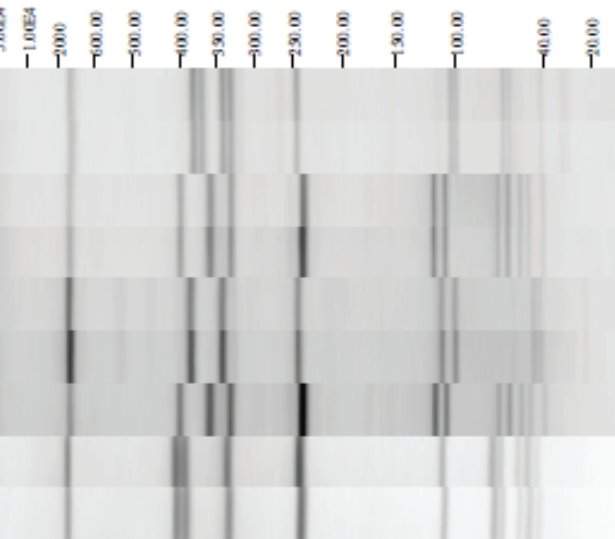

## PFGE-ApaI

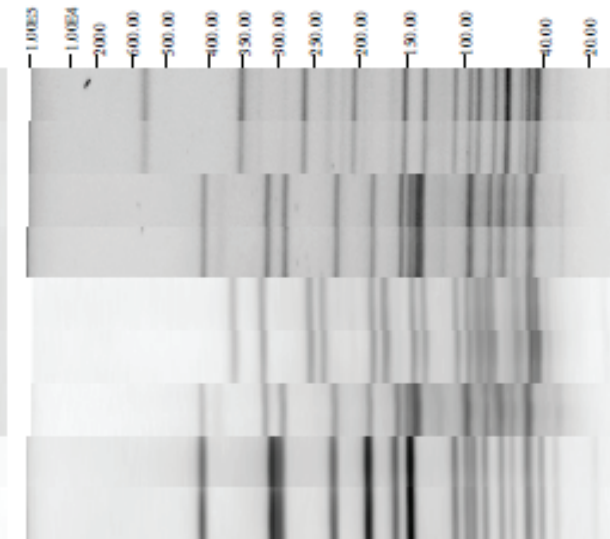

| Isolate ID | Ribotype  | Lineage | <i>SigB</i>  | Sampling date    | CU Pattern No_AscI | CU Pattern No_ApaI |
|------------|-----------|---------|--------------|------------------|--------------------|--------------------|
|            |           |         | Allelic type |                  |                    |                    |
| FSL V1-001 | DUP-1039C | II      | 57           | 10/2007 (Farm 1) | NYCU.GX6A16.0184   | NYCU.GX6A12.0129   |
| FSL V1-002 | DUP-1039C | II      | 57           | 10/2007 (Farm 1) | NYCU.GX6A16.0184   | NYCU.GX6A12.0129   |
| FSL V1-003 | DUP-1042C | I       | 58           | 01/2008 (Farm 1) | NYCU.GX6A16.0018   | NYCU.GX6A12.0242   |
| FSL V1-004 | DUP-1042C | I       | 58           | 01/2008 (Farm 1) | NYCU.GX6A16.0018   | NYCU.GX6A12.0242   |
| FSL V1-005 | DUP-1045A | II      | 57           | 01/2008 (Farm 1) | NYCU.GX6A16.0185   | NYCU.GX6A12.0206   |
| FSL V1-006 | DUP-1045A | II      | 57           | 01/2008 (Farm 1) | NYCU.GX6A16.0185   | NYCU.GX6A12.0206   |
| FSL V1-007 | DUP-1042C | I       | 58           | 01/2008 (Farm 1) | NYCU.GX6A16.0018   | NYCU.GX6A12.0242   |
| FSL V1-117 | DUP-1052A | I       | 63           | 06/2009 (Farm 2) | NYCU.GX6A16.0011   | NYCU.GX6A12.0282   |
| FSL V1-118 | DUP-1052A | I       | 63           | 06/2009 (Farm 2) | NYCU.GX6A16.0011   | NYCU.GX6A12.0282   |

## PFGE-AscI

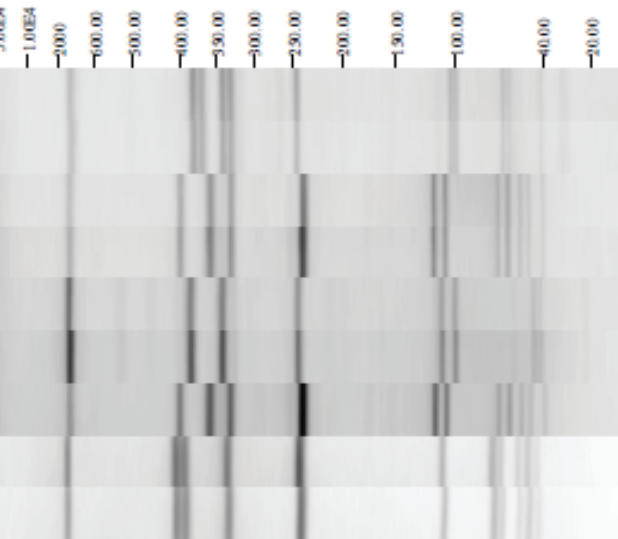

## PFGE-ApaI

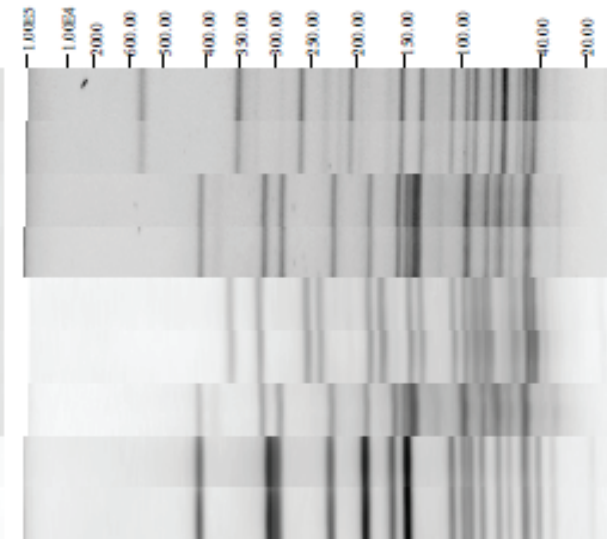

| Isolate ID | Ribotype  | Lineage | <i>SigB</i>  | Sampling date    | CU Pattern No_AscI | CU Pattern No_ApaI |
|------------|-----------|---------|--------------|------------------|--------------------|--------------------|
|            |           |         | Allelic type |                  |                    |                    |
| FSL V1-001 | DUP-1039C | II      | 57           | 10/2007 (Farm 1) | NYCU.GX6A16.0184   | NYCU.GX6A12.0129   |
| FSL V1-002 | DUP-1039C | II      | 57           | 10/2007 (Farm 1) | NYCU.GX6A16.0184   | NYCU.GX6A12.0129   |
| FSL V1-003 | DUP-1042C | I       | 58           | 01/2008 (Farm 1) | NYCU.GX6A16.0018   | NYCU.GX6A12.0242   |
| FSL V1-004 | DUP-1042C | I       | 58           | 01/2008 (Farm 1) | NYCU.GX6A16.0018   | NYCU.GX6A12.0242   |
| FSL V1-005 | DUP-1045A | II      | 57           | 01/2008 (Farm 1) | NYCU.GX6A16.0185   | NYCU.GX6A12.0206   |
| FSL V1-006 | DUP-1045A | II      | 57           | 01/2008 (Farm 1) | NYCU.GX6A16.0185   | NYCU.GX6A12.0206   |
| FSL V1-007 | DUP-1042C | I       | 58           | 01/2008 (Farm 1) | NYCU.GX6A16.0018   | NYCU.GX6A12.0242   |
| FSL V1-117 | DUP-1052A | I       | 63           | 06/2009 (Farm 2) | NYCU.GX6A16.0011   | NYCU.GX6A12.0282   |
| FSL V1-118 | DUP-1052A | I       | 63           | 06/2009 (Farm 2) | NYCU.GX6A16.0011   | NYCU.GX6A12.0282   |
