# Supplementary material
Source: PubMed Central journal article supplement (PMC3502902)
Supplement: AEM.01859-12_zam999103935so2.pdf [file AEM.01859-12_zam999103935so2.pdf]

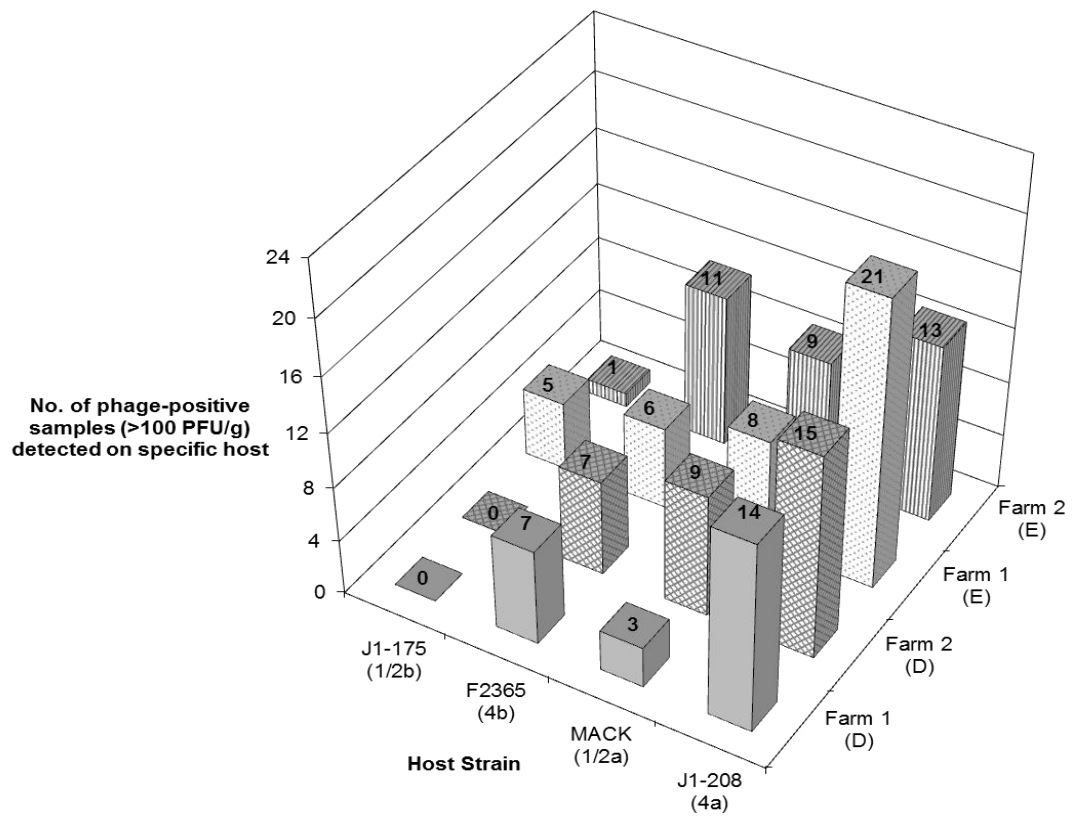

FIG. S2. Number of phage-positive samples, among silage samples collected on two dairy farms, detected on the four *L. monocytogenes* hosts by (i) direct phage isolation (D); and (ii) isolation after phage enrichment method (E).
