# Supplementary material
Source: PubMed Central journal article supplement (PMC3502902)
Supplement: AEM.01859-12_zam999103935so3.pdf [file AEM.01859-12_zam999103935so3.pdf]

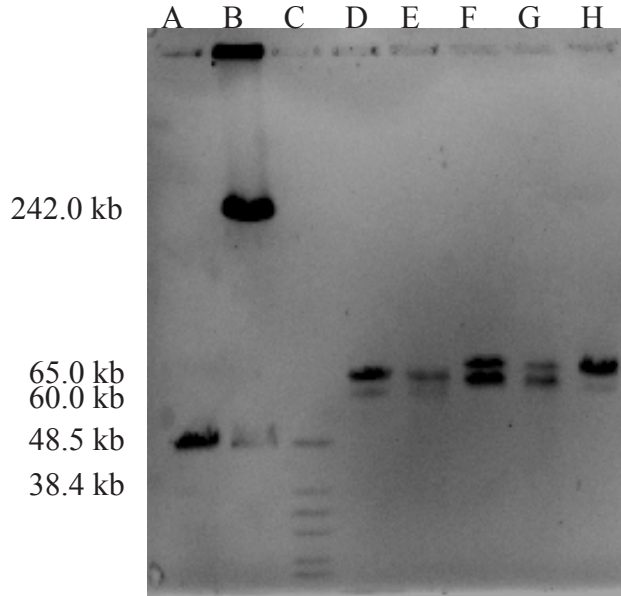

FIG. S3. PFGE image of DNA of selected listeriophages that showed two bands. Size markers: (A), lambda; (B), marker range 48kb-1Mb; (C), marker range 8-48kb. Phage DNA: (D) and (F), LP-026 and LP-036 without heat treatment; (E) and (G); LP-026 and LP-036 with heat treatment; (H), LP-037 without heat treatment.
