# Supplementary material
Source: PubMed Central journal article supplement (PMC3502902)
Supplement: AEM.01859-12_zam999103935so4.pdf [file AEM.01859-12_zam999103935so4.pdf]

Table S1. Summary of listeriophage isolates in the current study.

| No. | Host   | Phage  | Farm  | Plaque Morphology                         | Genome size <sup>a</sup><br>(kb) [farm visit #] | 100x RTD (PFU/ml) |
|-----|--------|--------|-------|-------------------------------------------|-------------------------------------------------|-------------------|
| 1   | J1-208 | LP-009 | Farm1 | 0.5 mm, clear, circular                   |                                                 | 7.0E+05           |
| 2   | J1-208 | LP-010 | Farm1 | 0.5 mm, clear, circular                   | 62/65 [5]                                       | 2.7E+05           |
| 3   | J1-208 | LP-011 | Farm1 | 0.5 mm, clear, circular                   |                                                 | 1.2E+06           |
| 4   | J1-208 | LP-012 | Farm1 | 1.5 mm, large, hazy, circular             |                                                 | 3.2E+06           |
| 5   | J1-208 | LP-013 | Farm1 | 0.5 mm, clear, circular                   | 59/63 [5]                                       | 3.0E+06           |
| 6   | J1-208 | LP-014 | Farm1 | 0.5 mm, clear, circular                   |                                                 | 2.1E+05           |
| 7   | J1-208 | LP-015 | Farm1 | 0.5 mm, clear, circular                   |                                                 | 4.2E+06           |
| 8   | J1-208 | LP-016 | Farm1 | 0.5 mm, clear/ a bit hazy, quite circular | no band                                         | 5.0E+05           |
| 9   | J1-175 | LP-017 | Farm1 | 0.5 mm, clear, circular                   |                                                 | 4.3E+06           |
| 10  | MACK   | LP-018 | Farm1 | 0.5 mm, clear/ a bit hazy, quite circular |                                                 | 2.7E+06           |
| 11  | MACK   | LP-019 | Farm1 | 0.5 mm, clear/ a bit hazy, quite circular | 61/65 [5]                                       | 4.2E+06           |
| 12  | F2365  | LP-020 | Farm1 | 1.5 mm, large, hazy, circular             |                                                 | 1.5E+05           |
| 13  | F2365  | LP-021 | Farm1 | 0.3-0.5 mm, clear/ a bit hazy, circular   | no band                                         | 1.5E+05           |
| 14  | J1-208 | LP-022 | Farm1 | 0.5 mm, clear, circular                   | 64/68 [6]                                       | 8.0E+05           |
| 15  | J1-208 | LP-023 | Farm1 | 0.3 mm, clear, circular                   | 61/66 [6]                                       | 3.3E+06           |
| 16  | F2365  | LP-024 | Farm1 | 1.5 mm, large, hazy, circular             |                                                 | 3.8E+05           |
| 17  | MACK   | LP-025 | Farm1 | 0.5 mm, clear/ a bit hazy, quite circular | 61/65 [6]                                       | 1.9E+05           |
| 18  | J1-208 | LP-026 | Farm1 | 0.3 mm, clear, circular                   | 61/66 [6]                                       | 2.6E+05           |
| 19  | F2365  | LP-027 | Farm1 | 1.5 mm, large, hazy, circular             |                                                 | 1.1E+06           |
| 20  | MACK   | LP-028 | Farm1 | 0.5 mm, clear/ a bit hazy, quite circular |                                                 | 1.0E+05           |
| 21  | J1-208 | LP-029 | Farm1 | 0.3 mm, clear, circular                   |                                                 | 4.8E+06           |
| 22  | F2365  | LP-030 | Farm1 | 1.5 mm, large, hazy, circular             | 33 [6]                                          | 1.7E+06           |
| 23  | MACK   | LP-031 | Farm1 | 0.3-0.5 mm, clear/ a bit hazy, circular   | 60/64 [6]                                       | 4.1E+05           |
| 24  | J1-208 | LP-032 | Farm1 | 0.3 mm, clear, circular                   | 62/67 [6]                                       | 3.3E+05           |
| 25  | F2365  | LP-033 | Farm1 | 1.5 mm, large, hazy, circular             |                                                 | 3.8E+05           |
| 26  | MACK   | LP-034 | Farm1 | 0.3 mm, clear/a bit hazy, circular        |                                                 | 1.5E+05           |
| 27  | J1-208 | LP-035 | Farm1 | 0.5 mm, clear, circular                   | 61/65 [6]                                       | 5.2E+05           |
| 28  | J1-208 | LP-036 | Farm1 | 0.3 mm, clear/a bit hazy, circular        | 58/63 [8]                                       | 2.4E+06           |
| 29  | J1-208 | LP-037 | Farm1 | 1.5 mm, large, clear/a bit hazy, circular | 58/64 [8]                                       | 3.1E+06           |
| 30  | J1-208 | LP-041 | Farm1 | 0.3 mm, clear/a bit hazy, circular        |                                                 | 2.0E+06           |
| 31  | J1-208 | LP-042 | Farm1 | 0.3 mm, clear/a bit hazy, circular        |                                                 | 2.0E+05           |
| 32  | J1-208 | LP-043 | Farm1 | 0.3 mm, clear/a bit hazy, circular        |                                                 | 5.3E+06           |
| 33  | J1-208 | LP-044 | Farm1 | 1.5 mm, large, clear/a bit hazy, circular | 61/67 [9]                                       | 7.0E+05           |
| 34  | J1-208 | LP-045 | Farm1 | 0.3 mm, clear/a bit hazy, circular        | 59/63 [9]                                       | 6.3E+05           |
| 35  | J1-208 | LP-046 | Farm1 | 0.3 mm, clear/a bit hazy, circular        | 62/66 [9]                                       | 3.8E+06           |
| 36  | MACK   | LP-047 | Farm1 | 0.3 mm, clear/a bit hazy, circular        |                                                 | 2.2E+06           |
| 37  | MACK   | LP-048 | Farm1 | 0.3 mm, clear/a bit hazy, circular        | 123 [9]                                         | 1.0E+05           |
| 38  | MACK   | LP-049 | Farm1 | 1.5 mm, large, clear/a bit hazy, circular | 31 [9]                                          | 9.0E+04           |
| 39  | J1-208 | LP-050 | Farm1 | 0.3 mm, clear/a bit hazy, circular        | 60/66 [10]                                      | 2.0E+05           |
| 40  | J1-208 | LP-051 | Farm1 | 0.3 mm, clear/a bit hazy, circular        | 62/67 [10]                                      | 1.9E+06           |
| 41  | J1-208 | LP-052 | Farm1 | 0.3 mm, clear/a bit hazy, circular        | 61/65 [10]                                      | 1.2E+06           |
| 42  | F2365  | LP-053 | Farm1 | 1.5 mm, large, clear/a bit hazy, circular |                                                 | 1.7E+06           |
| 43  | F2365  | LP-054 | Farm1 | 1.5 mm, large, clear/a bit hazy, circular | no band                                         | 2.9E+06           |
| 44  | F2365  | LP-057 | Farm1 | 1.5 mm, large, clear/a bit hazy, circular | no band                                         | 1.8E+06           |
| 45  | J1-208 | LP-058 | Farm1 | 0.3 mm, clear/a bit hazy, circular        | 61/66 [11]                                      | 3.8E+05           |
| 46  | J1-208 | LP-059 | Farm1 | 0.3 mm, clear/a bit hazy, circular        | 61/65 [11]                                      | 5.1E+05           |
| 47  | J1-208 | LP-060 | Farm1 | 0.3 mm, clear/a bit hazy, circular        | 63/68 [11]                                      | 3.6E+06           |
| 48  | J1-208 | LP-061 | Farm1 | 0.3 mm, clear/a bit hazy, circular        | 61/65 [11]                                      | 4.0E+05           |
| 49  | J1-208 | LP-062 | Farm1 | 0.3 mm, clear/a bit hazy, circular        | 61/66 [11]                                      | 5.8E+06           |
| 50  | F2365  | LP-063 | Farm2 | 0.1 mm, pinprick, clear, circular         | no band                                         | 2.7E+06           |

TABLE S1. Continued.

| No. | Host   | Phage  | Farm  | Plaque Morphology                         | Genome size <sup>a</sup><br>(kb) [farm visit #] | 100x RTD (PFU/ml) |
|-----|--------|--------|-------|-------------------------------------------|-------------------------------------------------|-------------------|
| 51  | MACK   | LP-064 | Farm2 | 1.5 mm, large, clear, circular            | 97 [1]                                          | 1.6E+06           |
| 52  | J1-208 | LP-065 | Farm2 | 1.5 mm, large, clear, circular            | 63 [1]                                          | 4.4E+05           |
| 53  | MACK   | LP-066 | Farm2 | 1.5 mm, large, clear, circular            | no band                                         | 2.9E+05           |
| 54  | J1-208 | LP-067 | Farm2 | 1.5 mm, large, clear, circular            | 62 [1]                                          | 3.6E+05           |
| 55  | F2365  | LP-068 | Farm2 | 0.1 mm, pinprick, clear, circular         | 119 [1]                                         | 8.7E+05           |
| 56  | MACK   | LP-069 | Farm2 | 0.3-0.5 mm, clear/ a bit hazy, circular   |                                                 | 2.2E+05           |
| 57  | J1-208 | LP-070 | Farm2 | 0.3-0.5 mm, clear/ a bit hazy, circular   | 63 [1]                                          | 2.3E+06           |
| 58  | J1-208 | LP-071 | Farm2 | 0.3-0.5 mm, clear/ a bit hazy, circular   | 66 [1]                                          | 4.5E+06           |
| 59  | J1-208 | LP-072 | Farm2 | 1.5 mm, large, clear, circular            | 60/65 [1]                                       | 2.6E+06           |
| 60  | J1-208 | LP-073 | Farm2 | 0.3-0.5 mm, clear/ a bit hazy, circular   | 61/66 [1]                                       | 3.6E+06           |
| 61  | F2365  | LP-074 | Farm2 | 0.3-0.5 mm, clear/ a bit hazy, circular   |                                                 | 4.0E+06           |
| 62  | MACK   | LP-075 | Farm2 | 0.3-0.5 mm, clear/ a bit hazy, circular   | 121 [1]                                         | 6.0E+05           |
| 63  | F2365  | LP-076 | Farm2 | 0.5 mm, clear, circular                   | no band                                         | 1.4E+06           |
| 64  | MACK   | LP-077 | Farm2 | 0.3-0.5 mm, clear/ a bit hazy, circular   | no band                                         | 1.9E+06           |
| 65  | J1-208 | LP-078 | Farm2 | 1.5 mm, large, clear, circular            |                                                 | 2.0E+06           |
| 66  | J1-208 | LP-079 | Farm2 | 1.5 mm, large, clear, circular            |                                                 | 3.5E+06           |
| 67  | J1-208 | LP-080 | Farm2 | 1.5 mm, large, clear, circular            | 61/65 [2]                                       | 1.3E+06           |
| 68  | J1-208 | LP-081 | Farm2 | 1.5 mm, large, clear, circular            | 61/65 [2]                                       | 3.4E+06           |
| 69  | J1-208 | LP-082 | Farm2 | 1.5 mm, large, clear, circular            | 64 [2]                                          | 2.1E+06           |
| 70  | MACK   | LP-083 | Farm2 | 0.3-0.5 mm, clear/ a bit hazy, circular   | 32 [2]                                          | 2.0E+05           |
| 71  | J1-208 | LP-084 | Farm2 | 0.3-0.5 mm, clear/ a bit hazy, circular   |                                                 | 4.6E+06           |
| 72  | F2365  | LP-085 | Farm2 | 1.5 mm, large, clear/a bit hazy, circular | 32 [2]                                          | 9.0E+05           |
| 73  | J1-208 | LP-086 | Farm2 | 0.3-0.5 mm, clear/ a bit hazy, circular   | 65 [2]                                          | 2.1E+05           |
| 74  | J1-208 | LP-087 | Farm2 | 1.5 mm, large, clear, circular            | 63/68 [2]                                       | 3.5E+05           |
| 75  | J1-175 | LP-088 | Farm2 | 0.3-0.5 mm, clear/ a bit hazy, circular   | no band                                         | 2.0E+05           |
| 76  | J1-208 | LP-089 | Farm2 | 0.5 mm, clear, circular                   |                                                 | 8.0E+05           |
| 77  | J1-208 | LP-090 | Farm2 | 0.5 mm, clear, circular                   | 58/63 [3]                                       | 2.7E+06           |
| 78  | J1-208 | LP-091 | Farm2 | 0.5 mm, clear, circular                   |                                                 | 3.6E+05           |
| 79  | J1-208 | LP-092 | Farm2 | 0.5 mm, clear, circular                   |                                                 | 2.2E+06           |
| 80  | F2365  | LP-093 | Farm2 | 0.3-0.5 mm, clear/ a bit hazy, circular   | no band                                         | 1.4E+06           |
| 81  | F2365  | LP-094 | Farm2 | 1.5 mm, large, clear/a bit hazy, circular | 26 [4]                                          | 1.3E+06           |
| 82  | F2365  | LP-095 | Farm2 | 0.3-0.5 mm, clear/ a bit hazy, circular   | 123 [4]                                         | 1.6E+06           |
| 83  | F2365  | LP-096 | Farm2 | 0.3-0.5 mm, clear/ a bit hazy, circular   |                                                 | 1.3E+06           |
| 84  | MACK   | LP-097 | Farm2 | 0.5 mm, clear, circular                   |                                                 | 1.3E+06           |
| 85  | MACK   | LP-098 | Farm2 | 0.5 mm, clear, circular                   |                                                 | 1.7E+06           |
| 86  | MACK   | LP-099 | Farm2 | 0.5 mm, clear, circular                   |                                                 | 1.6E+06           |
| 87  | MACK   | LP-100 | Farm2 | 0.5 mm, clear, circular                   |                                                 | 4.5E+06           |
| 88  | MACK   | LP-101 | Farm2 | 1.5 mm, large, clear, circular            | 41/83/115 [4]                                   | 8.5E+05           |
| 89  | MACK   | LP-102 | Farm2 | 0.5 mm, clear, circular                   |                                                 | 2.5E+05           |
| 90  | MACK   | LP-103 | Farm2 | 0.5 mm, clear, circular                   |                                                 | 9.0E+04           |
| 91  | MACK   | LP-104 | Farm2 | 0.5 mm, clear, circular                   |                                                 | 7.0E+05           |
| 92  | F2365  | LP-105 | Farm2 | 0.3-0.5 mm, clear/ a bit hazy, circular   | 140 [5]                                         | 2.7E+05           |
| 93  | F2365  | LP-106 | Farm2 | 0.3-0.5 mm, clear/ a bit hazy, circular   |                                                 | 2.6E+05           |
| 94  | F2365  | LP-107 | Farm2 | 0.3-0.5 mm, clear/ a bit hazy, circular   |                                                 | 2.8E+06           |
| 95  | J1-208 | LP-108 | Farm2 | 0.5 mm, clear, circular                   |                                                 | 1.9E+06           |
| 96  | J1-208 | LP-109 | Farm2 | 0.5 mm, clear, circular                   |                                                 | 1.8E+06           |
| 97  | J1-208 | LP-110 | Farm2 | 0.5 mm, clear, circular                   | 57/61 [4]                                       | 3.2E+05           |
| 98  | J1-208 | LP-111 | Farm2 | 0.5 mm, clear, circular                   |                                                 | 3.4E+05           |
| 99  | J1-208 | LP-112 | Farm2 | 1.5 mm, large, clear, circular            | 57/62 [4]                                       | 1.1E+06           |
| 100 | J1-208 | LP-113 | Farm2 | 0.5 mm, clear, circular                   | 58/63 [5]                                       | 1.7E+06           |
| 101 | J1-208 | LP-114 | Farm2 | 0.5 mm, clear, circular                   |                                                 | 2.9E+05           |
| 102 | J1-208 | LP-115 | Farm2 | 0.5 mm, clear, circular                   | 60/65 [5]                                       | 3.0E+05           |
| 103 | F2365  | LP-116 | Farm2 | 0.3 mm, clear, circular                   | 131 [6]                                         | 6.0E+05           |
| 104 | MACK   | LP-117 | Farm2 | 0.5 mm, clear, circular                   | 117 [6]                                         | 2.7E+05           |
| 105 | J1-208 | LP-118 | Farm2 | 0.5 mm, clear, circular                   | 68 [6]                                          | 2.5E+05           |
| 106 | F2365  | LP-119 | Farm2 | 0.5 mm, clear, circular                   | 136 [6]                                         | 3.5E+05           |
| 107 | MACK   | LP-120 | Farm2 | 0.5 mm, clear, circular                   | 134 [6]                                         | 7.0E+05           |
| 108 | J1-208 | LP-121 | Farm2 | 0.5 mm, clear, circular                   | 59/63 [6]                                       | 1.2E+06           |
| 109 | J1-208 | LP-122 | Farm2 | 0.5 mm, clear, circular                   | 60/63 [6]                                       | 3.3E+05           |
| 110 | MACK   | LP-123 | Farm2 | 0.5 mm, clear, circular                   | 132 [6]                                         | 3.9E+06           |
| 111 | F2365  | LP-124 | Farm2 | 0.5 mm, clear, circular                   | 127 [6]                                         | 9.4E+05           |
| 112 | MACK   | LP-125 | Farm2 | 0.5 mm, clear, circular                   | 135 [6]                                         | 2.6E+06           |
| 113 | J1-208 | LP-126 | Farm2 | 0.5 mm, clear, circular                   | 70 [6]                                          | 2.9E+05           |
| 114 | F2365  | LP-127 | Farm2 | 0.3 mm, clear, circular                   |                                                 | 3.3E+06           |

<sup>a</sup> Phage genome size determination was performed on 62 selected phages.
