# Supplementary material
Source: PubMed Central journal article supplement (PMC3502902)
Supplement: AEM.01859-12_zam999103935so5.pdf [file AEM.01859-12_zam999103935so5.pdf]

TABLE S2. Lysis groups for listeriophages isolated from two dairy farms

| Phage lysis group | No. of phage isolates from each farm (visit no. <sup>a</sup> ) | Lysis pattern of <i>L. monocytogenes</i> reference strain (serotype) <sup>b</sup> |               |               |             |             |             |             |             |            |             |             |             | Phage lysis pattern description |                                                             |
|-------------------|----------------------------------------------------------------|-----------------------------------------------------------------------------------|---------------|---------------|-------------|-------------|-------------|-------------|-------------|------------|-------------|-------------|-------------|---------------------------------|-------------------------------------------------------------|
|                   |                                                                | Mack (1/2a)                                                                       | J1-175 (1/2b) | J1-094 (1/2c) | C1-115 (3a) | J1-169 (3b) | J1-049 (3c) | F2-695 (4a) | J1-208 (4a) | F2365 (4b) | F2-501 (4b) | J1-158 (4b) | W1-110 (4b) |                                 | J2-071 (4c)                                                 |
| A                 | F1: 2 (6, 9)<br>F2: 4 (3-5)                                    | +/-                                                                               | -             | +/-           | +/-         | -           | -           | -           | +/-         | -          | -           | +/-         | -           | -                               | Lysis on specific hosts: 1/2a, 1/2c, 3a, 4a, and 4b strains |
| B                 | F1: 10 (5, 6, 8, 10, 11)<br>F2: 10 (1-6)                       | +/-                                                                               | -             | -             | +/-         | +/-         | -           | +           | +           | +/-        | +/-         | +/-         | +           | +                               | No lysis of 1/2b, 1/2c and 3c strains                       |
| C                 | F1: 3 (6, 9, 10)<br>F2: 5 (1, 2, 5)                            | -                                                                                 | -             | -             | -           | -           | -           | +           | +           | -          | +/-         | -           | +           | +/-                             | Lysis on specific hosts: mostly 4a, 4b, and 4c strains      |
| D                 | F1: 4 (6, 11)<br>F2: 5 (1, 2, 6)                               | +/-                                                                               | +/-           | +/-           | +/-         | +/-         | -           | +/-         | +           | -          | +/-         | +/-         | -           | +/-                             | No lysis of only 3c and 4b strains                          |
| E                 | F1: 1 (5)<br>F2: 22 (1, 4-6)                                   | +                                                                                 | +             | +             | +           | +/-         | -           | +/-         | +/-         | +/-        | +           | +/-         | +/-         | +/-                             | Broad host range. No lysis on only a 3c strain              |
| F                 | F1: 4 (5, 9)<br>F2: 6 (1, 2, 4)                                | +                                                                                 | +/-           | +             | -           | +/-         | -           | +           | +           | +          | +           | +           | +           | +                               | Broad host range. No lysis of only 3a and 3c strains        |
| G                 | F1: 0<br>F2: 4 (4, 5)                                          | +                                                                                 | -             | +             | +/-         | -           | -           | +/-         | +/-         | +          | -           | +           | +/-         | +/-                             | Lysis on mostly 4a, 4b, and 4c strains                      |
| H                 | F1: 1 (9)<br>F2: 6 (2, 4, 5)                                   | +                                                                                 | -             | +             | +/-         | -           | -           | +/-         | +/-         | +          | +           | +           | +/-         | +/-                             | Lysis on mostly 4a, 4b, and 4c strains                      |
| I                 | F1: 24 (5, 6, 8-11)<br>F2: 3 (2, 4)                            | +/-                                                                               | +/-           | -             | -           | -           | -           | +           | +           | +          | +           | +           | +           | +                               | Lysis on mostly 4a, 4b, and 4c strains                      |

<sup>a</sup> “F1” and “F2” indicate farm 1 and farm 2, respectively; see Table 1 for details on farm visits and phage recovery results from each farm visit.

<sup>b</sup> (-) indicates no lysis of a given strain by any phages in the lysis group; (+) indicates lysis of a given strain by phages in the lysis group; (+/-) indicates that while some phages in the lysis group showed lysis on a given strain, others did not. Heatmap and clustering analysis classifying phage lysis groups are shown in Fig. 1.
